# Supplementary material
Source: PubMed Central journal article supplement (PMC3302606)
Supplement: supp_78.7.2082_AEM-AEM07165-11-s01.pdf [file supp_78.7.2082_AEM-AEM07165-11-s01.pdf]

Microbial Community Succession during Lactate Amendment and Electron-acceptor Limitation Reveals a Predominance of Metal-reducing *Pelosinus* spp.

Jennifer J. Mosher<sup>1</sup>, Tommy J. Phelps<sup>1</sup>, Mircea Podar<sup>1</sup>, Richard A. Hurt<sup>1</sup>, James H. Campbell<sup>1</sup>, Meghan M. Drake<sup>1</sup>, James G. Moberly<sup>1</sup>, Christopher W. Schadt<sup>1</sup>, Steven D. Brown<sup>1</sup>, Terry C. Hazen<sup>2</sup>, Adam P. Arkin<sup>3</sup>, Anthony V. Palumbo<sup>1</sup>, Boris A. Faybishenko<sup>2</sup>, Dwayne A. Elias<sup>1\*</sup>

<sup>1</sup>Biosciences Division, Oak Ridge National Laboratory, Oak Ridge, TN

<sup>2</sup>Earth Sciences Division, Lawrence Berkeley National Laboratory, Berkeley, CA

<sup>3</sup>Physical Biosciences Division, Lawrence Berkeley National Laboratory, Berkeley, CA

Supplemental Information

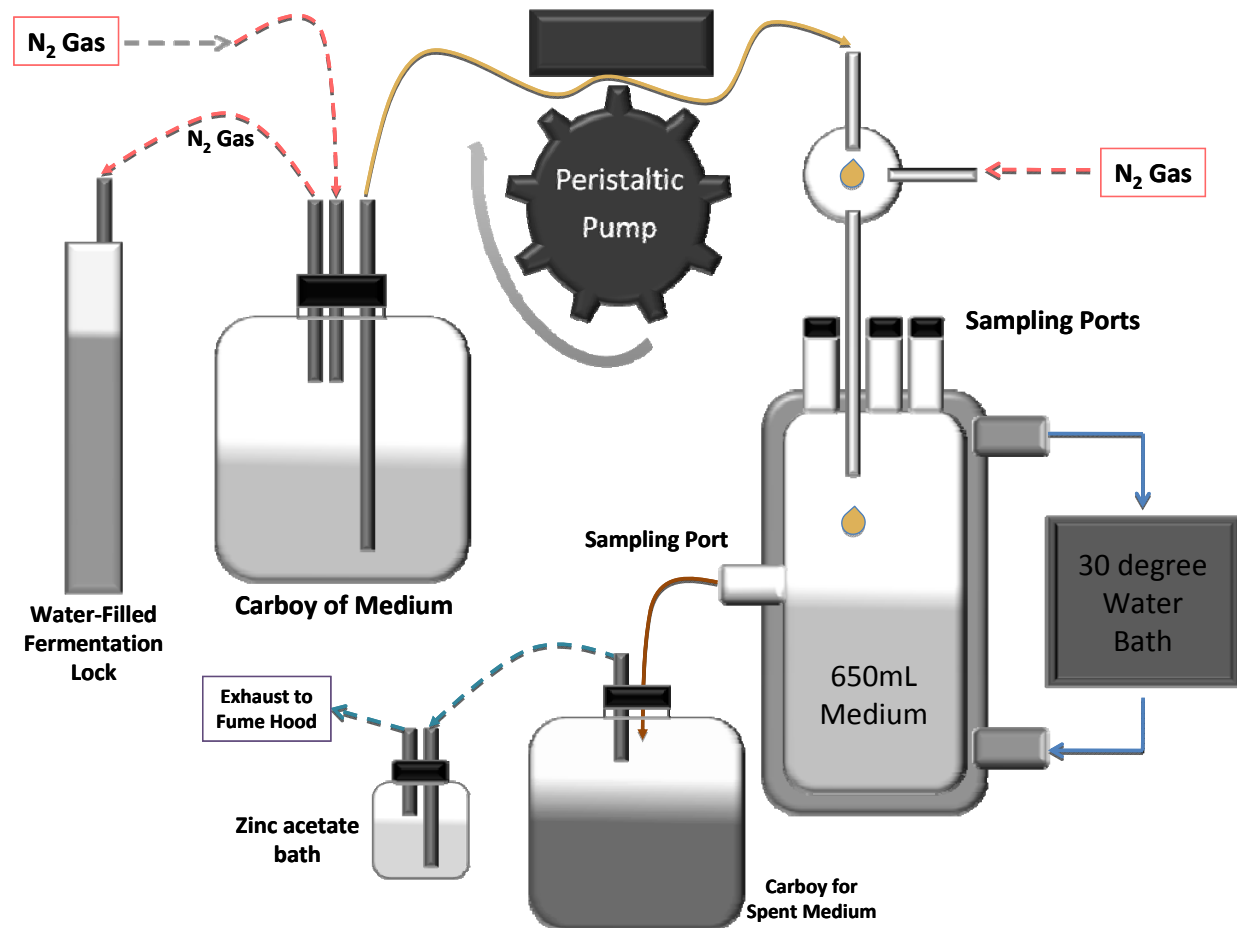

Supplemental Figure 1. Diagram of the continuous flow culture instrumentation operating triplicate reactors. The setup provides continuous culture under strict anaerobic conditions and is compatible with regular sampling of the consortium without contamination and exposure to oxygen.
